# Supplementary material for: Connected to belong: Soft Sciences vs Hard Sciences students ‘evaluation through peer education and digital storytelling to promote university well-being
Source: Research Square preprint supplement (doi:10.21203/rs.3.rs-7720247/v1), 2025-10-14
Supplement: Supplementary file 1 [file 2d1e0acd43a5a436c43e10ec.docx]

*2Appendix A*

| *Descriptive Statistics* | | | | | | | | | | | | | | | | | | | | | | | | | |
| --- | --- | --- | --- | --- | --- | --- | --- | --- | --- | --- | --- | --- | --- | --- | --- | --- | --- | --- | --- | --- | --- | --- | --- | --- | --- |
|  | |  | Mean | | Std. Deviation | | | Skewness | | | Std. Error of Skewness | | | Kurtosis | | Std. Error of Kurtosis | | | | Shapiro-Wilk | | P-value of Shapiro-Wilk | | | |
| Fe1 |  | Hard Sciences |  | 3.950 |  | 1.317 |  | | -1.282 |  | | 0.512 |  | | 0.748 | |  | 0.992 |  | | 0.774 | |  | < .001 |  | |
| Fe1 |  | Soft Sciences |  | 4.295 |  | 0.851 |  | | -1.333 |  | | 0.357 |  | | 1.578 | |  | 0.702 |  | | 0.740 | |  | < .001 |  | |
| Fe2 |  | Hard Sciences |  | 3.850 |  | 0.745 |  | | -0.591 |  | | 0.512 |  | | 0.925 | |  | 0.992 |  | | 0.826 | |  | 0.002 |  | |
| Fe2 |  | Soft Sciences |  | 4.000 |  | 0.778 |  | | -1.555 |  | | 0.357 |  | | 4.824 | |  | 0.702 |  | | 0.726 | |  | < .001 |  | |
| Fe3 |  | Hard Sciences |  | 3.650 |  | 0.875 |  | | -0.774 |  | | 0.512 |  | | 0.106 | |  | 0.992 |  | | 0.798 | |  | < .001 |  | |
| Fe3 |  | Soft Sciences |  | 3.705 |  | 0.930 |  | | -0.635 |  | | 0.357 |  | | 0.519 | |  | 0.702 |  | | 0.874 | |  | < .001 |  | |
| **Fe4** |  | **Hard Sciences** |  | **4.650** |  | **0.933** |  | | **-3.508** |  | | **0.512** |  | | **13.433** | |  | **0.992** |  | | **0.434** | |  | **< .001** |  | |
| Fe4 |  | Soft Sciences |  | 4.636 |  | 0.750 |  | | -2.398 |  | | 0.357 |  | | 5.714 | |  | 0.702 |  | | 0.545 | |  | < .001 |  | |
| Fe5 |  | Hard Sciences |  | 3.950 |  | 1.146 |  | | -1.059 |  | | 0.512 |  | | 0.783 | |  | 0.992 |  | | 0.835 | |  | 0.003 |  | |
| Fe5 |  | Soft Sciences |  | 4.250 |  | 0.811 |  | | -0.498 |  | | 0.357 |  | | -1.294 | |  | 0.702 |  | | 0.764 | |  | < .001 |  | |
| Fe6 |  | Hard Sciences |  | 3.650 |  | 1.226 |  | | -0.386 |  | | 0.512 |  | | -0.702 | |  | 0.992 |  | | 0.868 | |  | 0.011 |  | |
| Fe6 |  | Soft Sciences |  | 3.955 |  | 0.963 |  | | -0.560 |  | | 0.357 |  | | -0.621 | |  | 0.702 |  | | 0.847 | |  | < .001 |  | |
| Fe7 |  | Hard Sciences |  | 3.000 |  | 1.298 |  | | -0.161 |  | | 0.512 |  | | -1.196 | |  | 0.992 |  | | 0.897 | |  | 0.036 |  | |
| Fe7 |  | Soft Sciences |  | 3.341 |  | 0.805 |  | | -0.712 |  | | 0.357 |  | | 1.978 | |  | 0.702 |  | | 0.806 | |  | < .001 |  | |
| **Fe8** |  | **Hard Sciences** |  | **4.350** |  | **0.933** |  | | **-2.535** |  | | **0.512** |  | | **8.635** | |  | **0.992** |  | | **0.623** | |  | **< .001** |  | |
| Fe8 |  | Soft Sciences |  | 4.159 |  | 0.987 |  | | -1.702 |  | | 0.357 |  | | 3.411 | |  | 0.702 |  | | 0.736 | |  | < .001 |  | |
| Fe9 |  | Hard Sciences |  | 3.900 |  | 0.968 |  | | -0.944 |  | | 0.512 |  | | 0.335 | |  | 0.992 |  | | 0.785 | |  | < .001 |  | |
| Fe9 |  | Soft Sciences |  | 4.409 |  | 0.622 |  | | -1.157 |  | | 0.357 |  | | 3.347 | |  | 0.702 |  | | 0.680 | |  | < .001 |  | |
| Fe10 |  | Hard Sciences |  | 2.900 |  | 0.852 |  | | -0.363 |  | | 0.512 |  | | -0.303 | |  | 0.992 |  | | 0.869 | |  | 0.011 |  | |
| Fe10 |  | Soft Sciences |  | 3.273 |  | 0.758 |  | | -0.510 |  | | 0.357 |  | | 0.876 | |  | 0.702 |  | | 0.838 | |  | < .001 |  | |
| Fe11 |  | Hard Sciences |  | 3.250 |  | 0.910 |  | | -0.087 |  | | 0.512 |  | | -1.001 | |  | 0.992 |  | | 0.859 | |  | 0.007 |  | |
| Fe11 |  | Soft Sciences |  | 3.727 |  | 0.758 |  | | -0.496 |  | | 0.357 |  | | 0.259 | |  | 0.702 |  | | 0.828 | |  | < .001 |  | |
| **Fe12** |  | **Hard Sciences** |  | **4.950** |  | **0.224** |  | | **-4.472** |  | | **0.512** |  | | **20.000** | |  | **0.992** |  | | **0.236** | |  | **< .001** |  | |
| **Fe12** |  | **Soft Sciences** |  | **4.886** |  | **0.538** |  | | **-4.811** |  | | **0.357** |  | | **23.036** | |  | **0.702** |  | | **0.219** | |  | **< .001** |  | |
| Fe13 |  | Hard Sciences |  | 4.200 |  | 0.616 |  | | -0.120 |  | | 0.512 |  | | -0.207 | |  | 0.992 |  | | 0.771 | |  | < .001 |  | |
| Fe13 |  | Soft Sciences |  | 4.386 |  | 0.655 |  | | -0.599 |  | | 0.357 |  | | -0.576 | |  | 0.702 |  | | 0.756 | |  | < .001 |  | |
| Fe14 |  | Hard Sciences |  | 3.850 |  | 1.309 |  | | -1.103 |  | | 0.512 |  | | 0.380 | |  | 0.992 |  | | 0.812 | |  | 0.001 |  | |
| Fe14 |  | Soft Sciences |  | 4.182 |  | 1.187 |  | | -1.331 |  | | 0.357 |  | | 0.776 | |  | 0.702 |  | | 0.721 | |  | < .001 |  | |
| Fe15 |  | Hard Sciences |  | 3.950 |  | 0.999 |  | | -0.596 |  | | 0.512 |  | | -0.585 | |  | 0.992 |  | | 0.852 | |  | 0.006 |  | |
| Fe15 |  | Soft Sciences |  | 4.114 |  | 0.920 |  | | -1.171 |  | | 0.357 |  | | 1.815 | |  | 0.702 |  | | 0.810 | |  | < .001 |  | |
| Fe16 |  | Hard Sciences |  | 3.350 |  | 0.933 |  | | -1.240 |  | | 0.512 |  | | 0.523 | |  | 0.992 |  | | 0.726 | |  | < .001 |  | |
| Fe16 |  | Soft Sciences |  | 3.864 |  | 0.668 |  | | 0.160 |  | | 0.357 |  | | -0.680 | |  | 0.702 |  | | 0.793 | |  | < .001 |  | |
| **Fe17** |  | **Hard Sciences** |  | **4.900** |  | **0.308** |  | | **-2.888** |  | | **0.512** |  | | **7.037** | |  | **0.992** |  | | **0.351** | |  | **< .001** |  | |
| Fe17 |  | Soft Sciences |  | 4.636 |  | 0.613 |  | | -1.502 |  | | 0.357 |  | | 1.252 | |  | 0.702 |  | | 0.621 | |  | < .001 |  | |
| Fe18 |  | Hard Sciences |  | 4.500 |  | 0.761 |  | | -1.195 |  | | 0.512 |  | | -0.037 | |  | 0.992 |  | | 0.669 | |  | < .001 |  | |
| Fe18 |  | Soft Sciences |  | 4.614 |  | 0.689 |  | | -1.992 |  | | 0.357 |  | | 4.161 | |  | 0.702 |  | | 0.612 | |  | < .001 |  | |
| Fe19 |  | Hard Sciences |  | 4.050 |  | 1.050 |  | | -0.714 |  | | 0.512 |  | | -0.716 | |  | 0.992 |  | | 0.815 | |  | 0.001 |  | |
| Fe19 |  | Soft Sciences |  | 3.977 |  | 1.045 |  | | -0.721 |  | | 0.357 |  | | -0.090 | |  | 0.702 |  | | 0.833 | |  | < .001 |  | |
| Fe20 |  | Hard Sciences |  | 3.200 |  | 0.696 |  | | 0.750 |  | | 0.512 |  | | 1.484 | |  | 0.992 |  | | 0.790 | |  | < .001 |  | |
| Fe20 |  | Soft Sciences |  | 3.455 |  | 0.697 |  | | 0.385 |  | | 0.357 |  | | -0.002 | |  | 0.702 |  | | 0.815 | |  | < .001 |  | |
| **Ss21** |  | **Hard Sciences** |  | **1.050** |  | **0.224** |  | | **4.472** |  | | **0.512** |  | | **20.000** | |  | **0.992** |  | | **0.236** | |  | **< .001** |  | |
| **Ss21** |  | **Soft Sciences** |  | **1.023** |  | **0.151** |  | | **6.633** |  | | **0.357** |  | | **44.000** | |  | **0.702** |  | | **0.137** | |  | **< .001** |  | |
| Ss22 |  | Hard Sciences |  | 3.250 |  | 0.716 |  | | -0.418 |  | | 0.512 |  | | -0.826 | |  | 0.992 |  | | 0.795 | |  | < .001 |  | |
| Ss22 |  | Soft Sciences |  | 3.432 |  | 1.301 |  | | -0.275 |  | | 0.357 |  | | -0.936 | |  | 0.702 |  | | 0.882 | |  | < .001 |  | |
| Ss23 |  | Hard Sciences |  | 3.750 |  | 0.851 |  | | -0.606 |  | | 0.512 |  | | 0.239 | |  | 0.992 |  | | 0.844 | |  | 0.004 |  | |
| Ss23 |  | Soft Sciences |  | 3.977 |  | 0.952 |  | | -0.461 |  | | 0.357 |  | | -0.833 | |  | 0.702 |  | | 0.844 | |  | < .001 |  | |
| Ss24 |  | Hard Sciences |  | 2.650 |  | 1.089 |  | | -0.292 |  | | 0.512 |  | | -1.125 | |  | 0.992 |  | | 0.867 | |  | 0.010 |  | |
| Ss24 |  | Soft Sciences |  | 2.682 |  | 1.272 |  | | 0.211 |  | | 0.357 |  | | -0.952 | |  | 0.702 |  | | 0.903 | |  | 0.001 |  | |
| Ss25 |  | Hard Sciences |  | 3.550 |  | 1.356 |  | | -0.187 |  | | 0.512 |  | | -1.376 | |  | 0.992 |  | | 0.838 | |  | 0.003 |  | |
| Ss25 |  | Soft Sciences |  | 3.773 |  | 1.097 |  | | -0.410 |  | | 0.357 |  | | -1.121 | |  | 0.702 |  | | 0.845 | |  | < .001 |  | |
| Ss26 |  | Hard Sciences |  | 3.650 |  | 0.933 |  | | -0.055 |  | | 0.512 |  | | -0.734 | |  | 0.992 |  | | 0.887 | |  | 0.023 |  | |
| Ss26 |  | Soft Sciences |  | 3.795 |  | 1.002 |  | | -0.585 |  | | 0.357 |  | | 0.026 | |  | 0.702 |  | | 0.877 | |  | < .001 |  | |
| Ss27 |  | Hard Sciences |  | 3.950 |  | 0.605 |  | | 0.012 |  | | 0.512 |  | | 0.189 | |  | 0.992 |  | | 0.768 | |  | < .001 |  | |
| Ss27 |  | Soft Sciences |  | 4.068 |  | 0.846 |  | | -1.098 |  | | 0.357 |  | | 2.492 | |  | 0.702 |  | | 0.807 | |  | < .001 |  | |
| Ss28 |  | Hard Sciences |  | 2.700 |  | 1.380 |  | | 0.336 |  | | 0.512 |  | | -0.904 | |  | 0.992 |  | | 0.892 | |  | 0.029 |  | |
| Ss28 |  | Soft Sciences |  | 2.614 |  | 1.280 |  | | 0.153 |  | | 0.357 |  | | -1.095 | |  | 0.702 |  | | 0.890 | |  | < .001 |  | |
| Ss29 |  | Hard Sciences |  | 4.550 |  | 0.826 |  | | -2.047 |  | | 0.512 |  | | 4.080 | |  | 0.992 |  | | 0.618 | |  | < .001 |  | |
| Ss29 |  | Soft Sciences |  | 4.500 |  | 1.000 |  | | -2.193 |  | | 0.357 |  | | 4.126 | |  | 0.702 |  | | 0.568 | |  | < .001 |  | |
| Ss30 |  | Hard Sciences |  | 4.100 |  | 0.718 |  | | -0.152 |  | | 0.512 |  | | -0.880 | |  | 0.992 |  | | 0.812 | |  | 0.001 |  | |
| Ss30 |  | Soft Sciences |  | 4.159 |  | 0.645 |  | | -0.156 |  | | 0.357 |  | | -0.540 | |  | 0.702 |  | | 0.784 | |  | < .001 |  | |
| Ss31 |  | Hard Sciences |  | 3.800 |  | 1.005 |  | | -0.594 |  | | 0.512 |  | | -0.490 | |  | 0.992 |  | | 0.850 | |  | 0.005 |  | |
| Ss31 |  | Soft Sciences |  | 3.841 |  | 1.055 |  | | -0.663 |  | | 0.357 |  | | -0.173 | |  | 0.702 |  | | 0.868 | |  | < .001 |  | |
| Ss32 |  | Hard Sciences |  | 3.500 |  | 0.946 |  | | -0.829 |  | | 0.512 |  | | 1.446 | |  | 0.992 |  | | 0.867 | |  | 0.011 |  | |
| Ss32 |  | Soft Sciences |  | 3.568 |  | 1.301 |  | | -0.654 |  | | 0.357 |  | | -0.722 | |  | 0.702 |  | | 0.856 | |  | < .001 |  | |
| Ss33 |  | Hard Sciences |  | 3.600 |  | 0.883 |  | | -0.082 |  | | 0.512 |  | | -0.474 | |  | 0.992 |  | | 0.887 | |  | 0.023 |  | |
| Ss33 |  | Soft Sciences |  | 3.636 |  | 0.967 |  | | -0.163 |  | | 0.357 |  | | -0.877 | |  | 0.702 |  | | 0.879 | |  | < .001 |  | |
| So34 |  | Hard Sciences |  | 4.800 |  | 0.410 |  | | -1.624 |  | | 0.512 |  | | 0.699 | |  | 0.992 |  | | 0.495 | |  | < .001 |  | |
| So34 |  | Soft Sciences |  | 4.545 |  | 1.022 |  | | -2.525 |  | | 0.357 |  | | 5.881 | |  | 0.702 |  | | 0.513 | |  | < .001 |  | |
| So35 |  | Hard Sciences |  | 4.250 |  | 0.851 |  | | -1.104 |  | | 0.512 |  | | 1.067 | |  | 0.992 |  | | 0.792 | |  | < .001 |  | |
| So35 |  | Soft Sciences |  | 4.000 |  | 1.121 |  | | -1.246 |  | | 0.357 |  | | 0.950 | |  | 0.702 |  | | 0.787 | |  | < .001 |  | |
| So36 |  | Hard Sciences |  | 3.950 |  | 0.945 |  | | -0.726 |  | | 0.512 |  | | -0.031 | |  | 0.992 |  | | 0.845 | |  | 0.004 |  | |
| So36 |  | Soft Sciences |  | 3.591 |  | 1.300 |  | | -0.642 |  | | 0.357 |  | | -0.680 | |  | 0.702 |  | | 0.864 | |  | < .001 |  | |
| So37 |  | Hard Sciences |  | 4.200 |  | 0.696 |  | | -1.333 |  | | 0.512 |  | | 4.442 | |  | 0.992 |  | | 0.684 | |  | < .001 |  | |
| So37 |  | Soft Sciences |  | 3.909 |  | 1.030 |  | | -0.480 |  | | 0.357 |  | | -0.944 | |  | 0.702 |  | | 0.844 | |  | < .001 |  | |
| So38 |  | Hard Sciences |  | 4.550 |  | 0.999 |  | | -2.090 |  | | 0.512 |  | | 3.075 | |  | 0.992 |  | | 0.509 | |  | < .001 |  | |
| So38 |  | Soft Sciences |  | 4.409 |  | 0.923 |  | | -1.300 |  | | 0.357 |  | | 0.413 | |  | 0.702 |  | | 0.671 | |  | < .001 |  | |
| So39 |  | Hard Sciences |  | 3.900 |  | 1.210 |  | | -0.979 |  | | 0.512 |  | | 0.189 | |  | 0.992 |  | | 0.836 | |  | 0.003 |  | |
| So39 |  | Soft Sciences |  | 4.091 |  | 0.772 |  | | -0.478 |  | | 0.357 |  | | -0.212 | |  | 0.702 |  | | 0.832 | |  | < .001 |  | |
| So40 |  | Hard Sciences |  | 3.950 |  | 1.050 |  | | -0.801 |  | | 0.512 |  | | -0.360 | |  | 0.992 |  | | 0.819 | |  | 0.002 |  | |
| So40 |  | Soft Sciences |  | 3.955 |  | 1.160 |  | | -1.030 |  | | 0.357 |  | | 0.277 | |  | 0.702 |  | | 0.817 | |  | < .001 |  | |
| So41 |  | Hard Sciences |  | 3.900 |  | 0.641 |  | | 0.080 |  | | 0.512 |  | | -0.250 | |  | 0.992 |  | | 0.788 | |  | < .001 |  | |
| So41 |  | Soft Sciences |  | 3.773 |  | 0.831 |  | | -0.051 |  | | 0.357 |  | | -0.672 | |  | 0.702 |  | | 0.863 | |  | < .001 |  | |
| So42 |  | Hard Sciences |  | 4.050 |  | 1.050 |  | | -0.714 |  | | 0.512 |  | | -0.716 | |  | 0.992 |  | | 0.815 | |  | 0.001 |  | |
| So42 |  | Soft Sciences |  | 4.227 |  | 0.961 |  | | -1.141 |  | | 0.357 |  | | 0.394 | |  | 0.702 |  | | 0.759 | |  | < .001 |  | |
| So43 |  | Hard Sciences |  | 3.650 |  | 1.040 |  | | -0.757 |  | | 0.512 |  | | 0.858 | |  | 0.992 |  | | 0.884 | |  | 0.021 |  | |
| So43 |  | Soft Sciences |  | 3.750 |  | 0.866 |  | | -0.155 |  | | 0.357 |  | | -0.625 | |  | 0.702 |  | | 0.871 | |  | < .001 |  | |
| So44 |  | Hard Sciences |  | 3.350 |  | 0.745 |  | | 0.151 |  | | 0.512 |  | | 0.082 | |  | 0.992 |  | | 0.855 | |  | 0.006 |  | |
| So44 |  | Soft Sciences |  | 3.750 |  | 0.719 |  | | -0.368 |  | | 0.357 |  | | 0.260 | |  | 0.702 |  | | 0.827 | |  | < .001 |  | |
| So45 |  | Hard Sciences |  | 3.650 |  | 0.875 |  | | -0.250 |  | | 0.512 |  | | -0.337 | |  | 0.992 |  | | 0.881 | |  | 0.018 |  | |
| So45 |  | Soft Sciences |  | 3.045 |  | 1.346 |  | | -0.146 |  | | 0.357 |  | | -1.106 | |  | 0.702 |  | | 0.900 | |  | 0.001 |  | |
| Ac46 |  | Hard Sciences |  | 4.700 |  | 0.470 |  | | -0.945 |  | | 0.512 |  | | -1.242 | |  | 0.992 |  | | 0.580 | |  | < .001 |  | |
| **Ac46** |  | **Soft Sciences** |  | **4.705** |  | **0.765** |  | | **-3.351** |  | | **0.357** |  | | **12.926** | |  | **0.702** |  | | **0.450** | |  | **< .001** |  | |
| **Ac47** |  | **Hard Sciences** |  | **4.800** |  | **0.523** |  | | **-2.745** |  | | **0.512** |  | | **7.401** | |  | **0.992** |  | | **0.447** | |  | **< .001** |  | |
| **Ac47** |  | **Soft Sciences** |  | **4.750** |  | **0.651** |  | | **-2.875** |  | | **0.357** |  | | **8.263** | |  | **0.702** |  | | **0.447** | |  | **< .001** |  | |
| Ac48 |  | Hard Sciences |  | 3.800 |  | 1.508 |  | | -0.749 |  | | 0.512 |  | | -1.045 | |  | 0.992 |  | | 0.761 | |  | < .001 |  | |
| Ac48 |  | Soft Sciences |  | 3.386 |  | 1.385 |  | | -0.414 |  | | 0.357 |  | | -1.039 | |  | 0.702 |  | | 0.878 | |  | < .001 |  | |
| Ac49 |  | Hard Sciences |  | 3.400 |  | 1.095 |  | | -0.384 |  | | 0.512 |  | | -0.257 | |  | 0.992 |  | | 0.917 | |  | 0.089 |  | |
| Ac49 |  | Soft Sciences |  | 3.591 |  | 1.041 |  | | -0.124 |  | | 0.357 |  | | -0.572 | |  | 0.702 |  | | 0.878 | |  | < .001 |  | |
| Ac50 |  | Hard Sciences |  | 4.150 |  | 0.933 |  | | -0.756 |  | | 0.512 |  | | -0.391 | |  | 0.992 |  | | 0.817 | |  | 0.002 |  | |
| Ac50 |  | Soft Sciences |  | 4.364 |  | 0.865 |  | | -1.702 |  | | 0.357 |  | | 3.915 | |  | 0.702 |  | | 0.721 | |  | < .001 |  | |
| Ac51 |  | Hard Sciences |  | 4.400 |  | 0.681 |  | | -0.712 |  | | 0.512 |  | | -0.446 | |  | 0.992 |  | | 0.760 | |  | < .001 |  | |
| Ac51 |  | Soft Sciences |  | 4.477 |  | 0.821 |  | | -1.377 |  | | 0.357 |  | | 0.831 | |  | 0.702 |  | | 0.671 | |  | < .001 |  | |
| Ac52 |  | Hard Sciences |  | 4.200 |  | 0.834 |  | | -1.018 |  | | 0.512 |  | | 1.080 | |  | 0.992 |  | | 0.804 | |  | < .001 |  | |
| Ac52 |  | Soft Sciences |  | 4.091 |  | 0.858 |  | | -0.643 |  | | 0.357 |  | | -0.233 | |  | 0.702 |  | | 0.833 | |  | < .001 |  | |
| Ac53 |  | Hard Sciences |  | 3.900 |  | 1.252 |  | | -0.865 |  | | 0.512 |  | | -0.233 | |  | 0.992 |  | | 0.827 | |  | 0.002 |  | |
| Ac53 |  | Soft Sciences |  | 4.045 |  | 1.160 |  | | -1.121 |  | | 0.357 |  | | 0.470 | |  | 0.702 |  | | 0.791 | |  | < .001 |  | |
| Ac54 |  | Hard Sciences |  | 3.900 |  | 1.071 |  | | -1.211 |  | | 0.512 |  | | 1.647 | |  | 0.992 |  | | 0.831 | |  | 0.003 |  | |
| Ac54 |  | Soft Sciences |  | 4.091 |  | 0.884 |  | | -0.606 |  | | 0.357 |  | | -0.486 | |  | 0.702 |  | | 0.832 | |  | < .001 |  | |
|  | | | | | | | | | | | | | | | | | | | | | | | | | |

The internal consistency of the scale was excellent (Cronbach’s α = 0.884, 95% CI [0.842, 0.926]), indicating high homogeneity among the items.

***After removing three items with extreme kurtosis values **(Fe12, Ss21, Ac46),** the internal consistency slightly increased (Cronbach’s α = 0.891, 95% CI [0.851, 0.931]), suggesting that these items were not contributing positively to the scale’s reliability.
